# Supplementary material for: Spread of Avian Influenza Viruses by Common Teal (Anas crecca) in Europe
Source: PubMed Central journal article supplement (PMC2750755; doi:10.1371/journal.pone.0007289), 2009-10-05

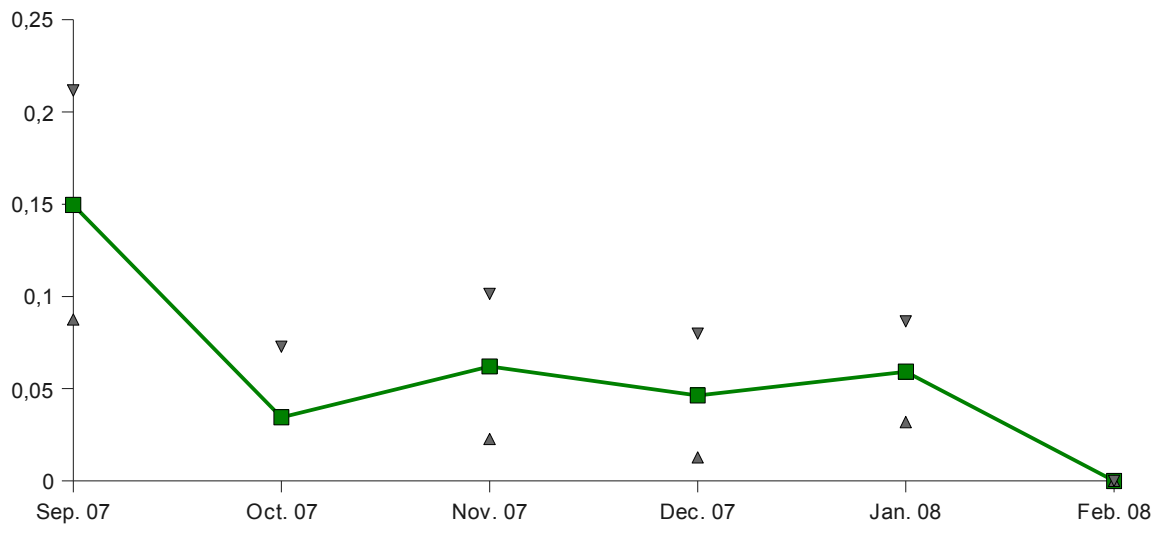

Supplement: pone.0007289.s001.pdf [file pone.0007289.s001.pdf]
